# Supplementary material for: Comprehensive mapping of the Helicobacter pylori NikR regulon provides new insights in bacterial nickel responses
Source: PubMed Central journal article supplement (PMC5385501; doi:10.1038/srep45458), 2017-04-10
Supplement: srep45458-s1.pdf [file srep45458-s1.pdf]

## **Comprehensive mapping of the *Helicobacter pylori* NikR regulon provides new insights in bacterial nickel responses**

Andrea Vannini<sup>1,3\*</sup> & Eva Pinatel<sup>2\*</sup>, Paolo Emidio Costantini<sup>1</sup>, Simone Pellicciari<sup>1</sup>, Davide Roncarati<sup>1</sup>, Simone Puccio<sup>2,4</sup>, Gianluca De Bellis<sup>2</sup>, Clelia Peano<sup>2§</sup> and Alberto Danielli<sup>1§</sup>

<sup>1</sup> FaBiT - Department of Pharmacy and Biotechnology, University of Bologna, 40126, Bologna, Italy

<sup>2</sup> Institute of Biomedical Technologies, National Research Council, 20090 Segrate, Milan, Italy

<sup>3</sup> DIMES Department of Experimental, Diagnostic and Specialty Medicine, University of Bologna, 40138 Bologna, Italy

<sup>4</sup> Doctoral School of Molecular and Translational Medicine, University of Milan, 20090 Segrate, Italy

\* equally contributed

§ co-corresponding

## SUPPLEMENTARY INFORMATION

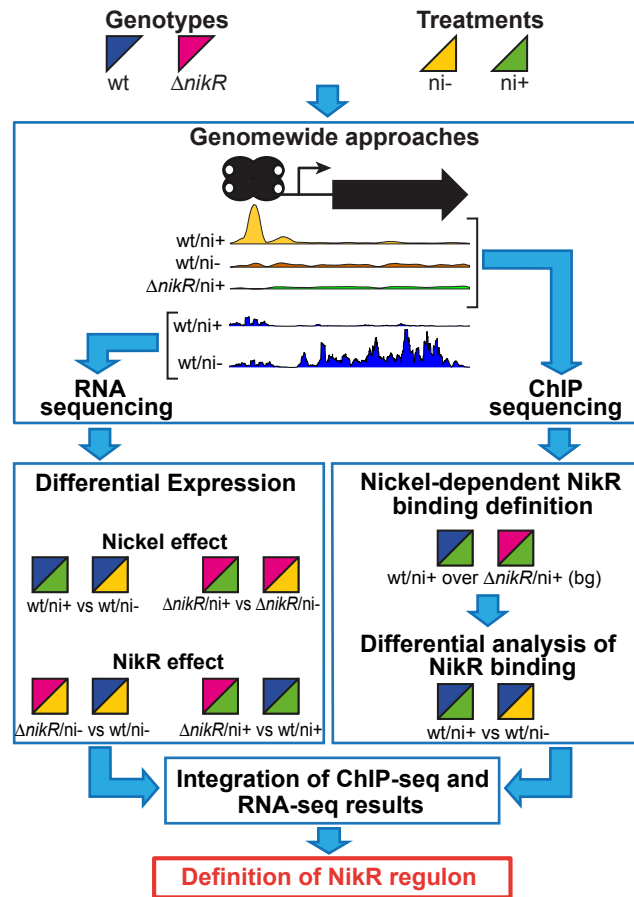

**Fig S1. Schematic representation of the experimental design.**

Bacterial cultures of the wt and  $\Delta$ *nikR* mutant treated for 20 min with NiSO<sub>4</sub> 500  $\mu$ M (ni+) or untreated (ni-) were used as starting material for ChIP and RNA sequencing. The effects of nickel treatment and *nikR* knockout were analysed to unravel direct and indirect effects in the NikR regulon through the integration of the two different datasets.

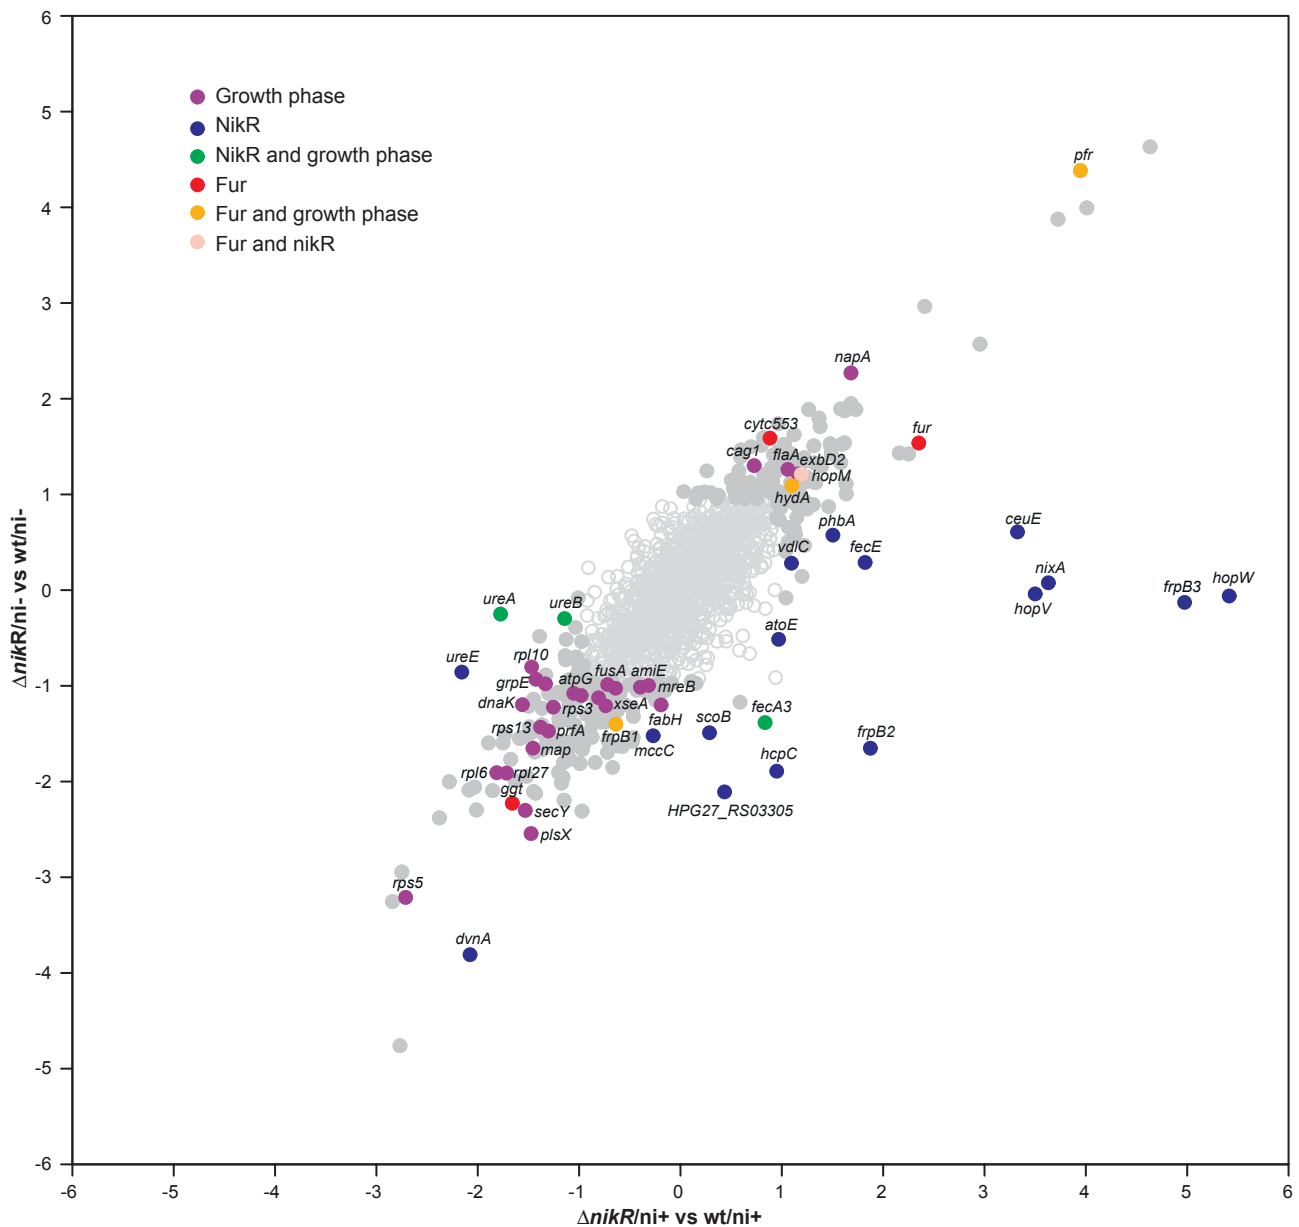

**Fig S2. Effect of *nikR* deletion on *H. pylori* transcript levels.**

RNA-seq derived log<sub>2</sub>FC values for  $\Delta nikR$  vs wt genotypes are reported both in presence (x-axis) and absence (y-axis) of nickel treatment. Differentially expressed genes (log<sub>2</sub>FC  $\geq$  |1|; adj p < 0.01) in at least one treatment are represented as filled circles; empty grey circles correspond to non-regulated genes. Analysis between the wt and  $\Delta nikR$  strains treated with nickel (x-axis) outlined 194 DEGs. The upregulated genes include several apo-Fur repressed genes (red), together with the *fur* gene itself, and other genes reported to be induced in the late phase of bacterial growth (violet). Oppositely, several holo-Fur repressed genes and/or genes that are repressed in the stationary growth phase (violet/orange) resulted downregulated in this comparison, even if the wt and  $\Delta nikR$  strains were grown in parallel to the same OD values (Supplementary Table S2). The same comparative analysis in the absence of nickel treatment (y-axis) supported this interpretation. In fact, out of the 261 DEGs identified, only a handful of nickel-responsive genes pinpointed in the wt strain were spotted, while most differentially expressed transcripts belong to stationary phase- and/or Fur-regulated genes (Supplementary Table S2).

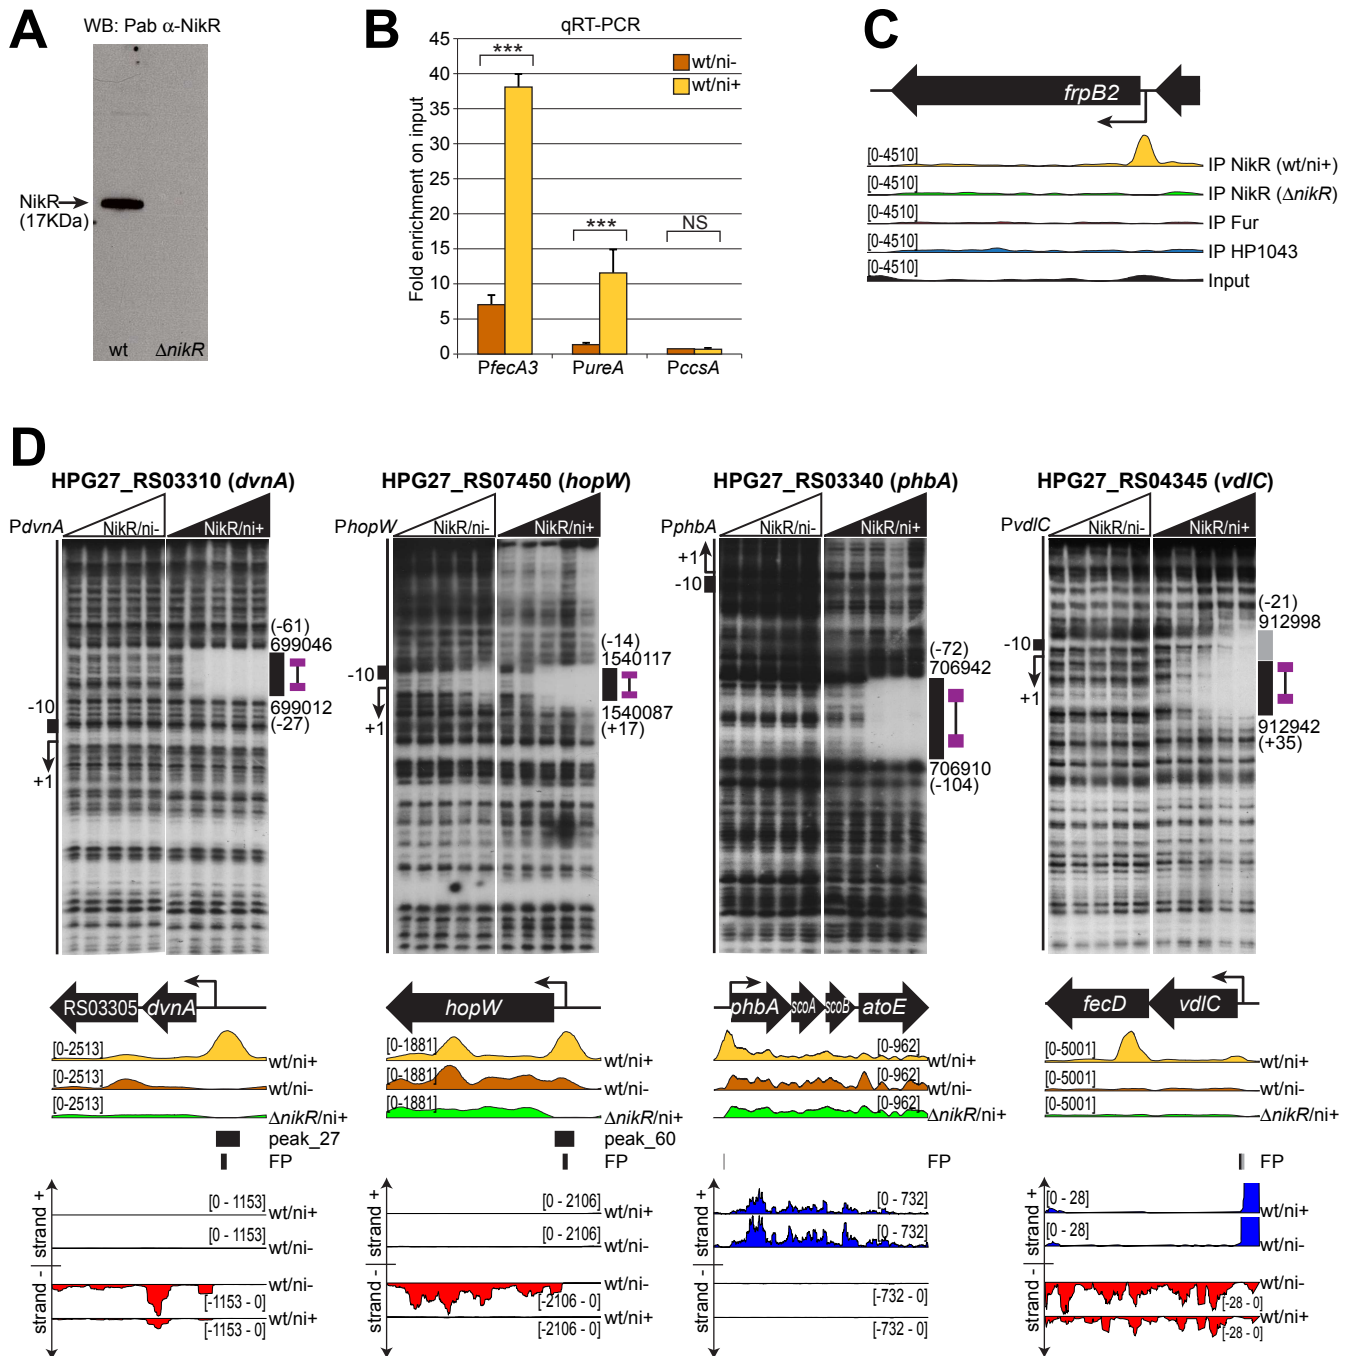

**Fig S3. Validation of additional new NikR-regulated promoters by DNase I footprinting.**

A) Western blot using the purified polyclonal antibody anti-NikR (1:1000) and the bacterial lysate of wt (left) or  $\Delta$ nikR strains (right). B) Evaluation of the enrichment of the DNA regions encompassing *PfecA3*, *PureA* (specific NikR targets) and *PccsA* (non-specific target) by qRT-PCR on the IPs before the generation of the sequencing libraries, normalized on INPUT (chromatin sheared but not immunoprecipitated). C) ChIP-seq profiles of the *frpB2* genomic locus: using the anti-NikR antibody in the wt strain (wt/ni+),  $\Delta$ nikR (negative control), performed with antisera specific for other transcriptional regulators (Fur or HP1043) or the profile of the INPUT control. D) DNase I footprinting of radiolabeled *Pdvna*, *PphbA* and *PvdIC* DNA probes with 0, 9.7, 29, 97 and 290 nM of the NikR tetramer and *PhopW* probe with 0, 0.53, 1.6, 4.9 and 14.7 nM of the NikR tetramers, without nickel (left side of each panel) or with the addition of 150  $\mu$ M NiSO<sub>4</sub> (right side of each panel). Legends and symbols as in Fig. 2.

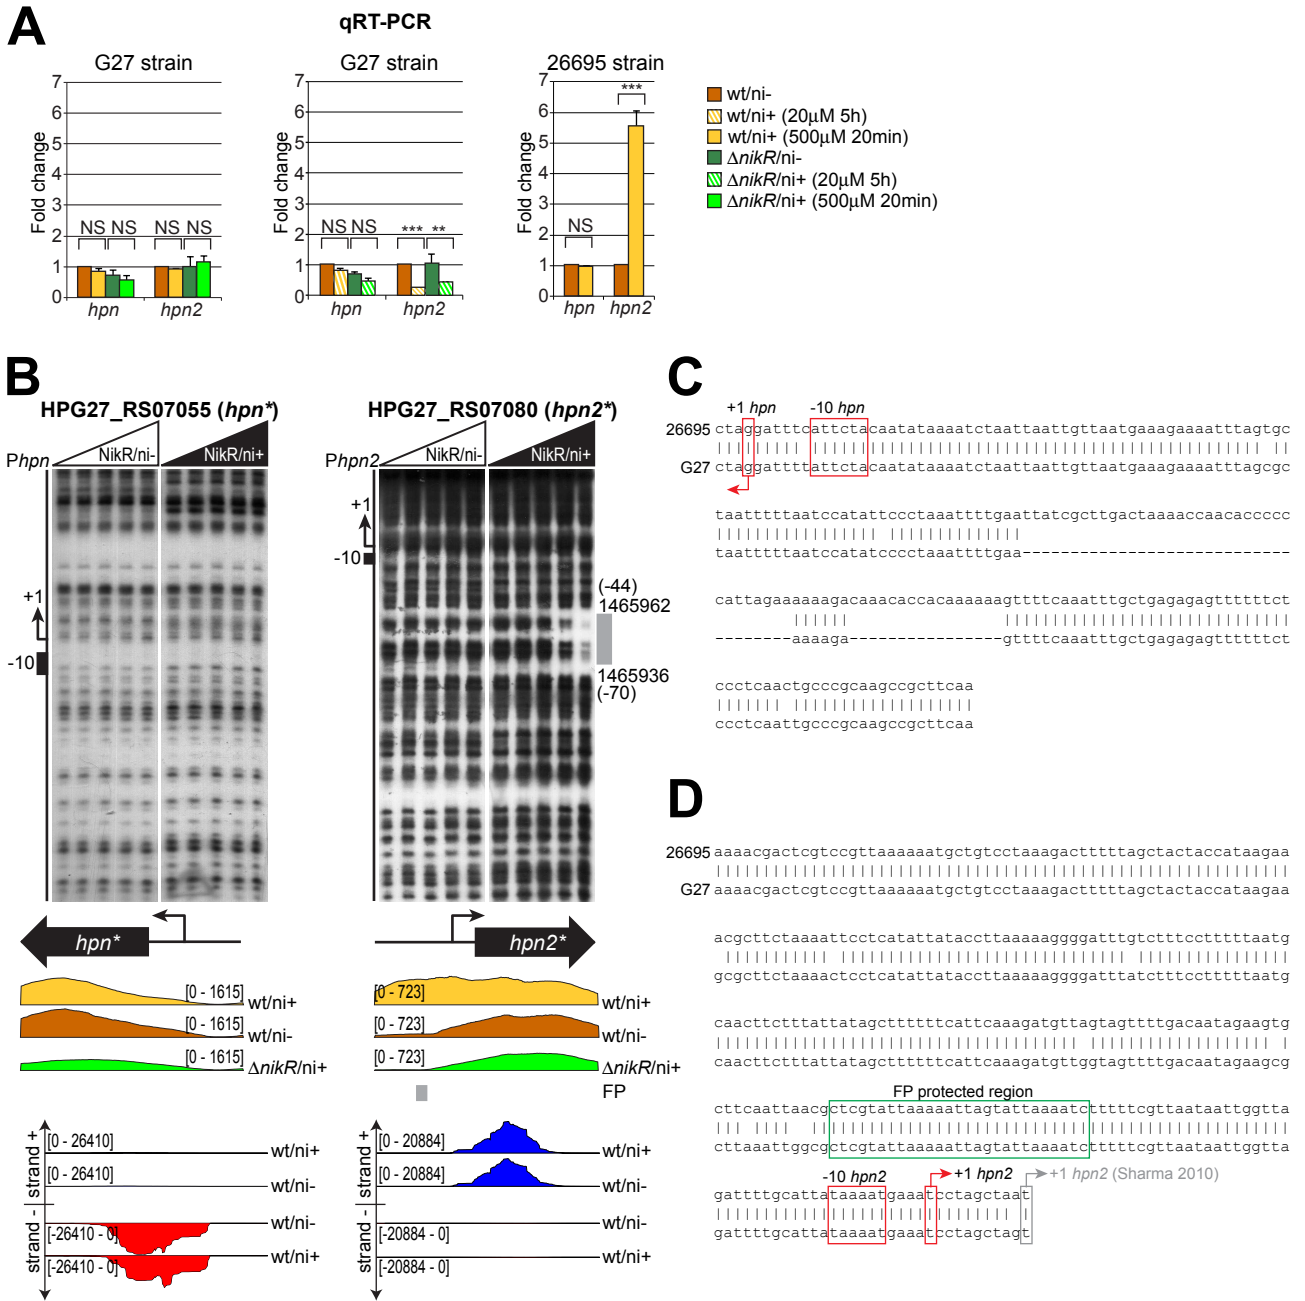

**Fig S4. *hpn* and *hpn2* and the G27 *NikR* regulon.**

A) *hpn* and *hpn2* gene expression levels are reported for wt and  $\Delta nikR$  strain treated with  $\text{NiSO}_4$  500  $\mu\text{M}$  for 20 min or 20  $\mu\text{M}$  for 5h and untreated. Results show fold changes (mean $\pm$ SD) relative to the wt/ni- condition.  $\Delta$ Cts were obtained after normalization on 16S rRNA levels and at least three biological replicates were performed. B) Footprinting of radiolabeled *hpn* and *hpn2* DNA probes mixed with 0, 8.7, 29 and 87 nM of *NikR* tetramers, without nickel (left side of each panel) or with the addition of 150  $\mu\text{M}$   $\text{NiSO}_4$  (right side of each panel). Legends and symbols as in Fig. 2. Asterisks indicate a different reading frame considered for the *hpn* and *hpn2* genes, which are mis-annotated in the refseq GCF\_000021165.1 annotation. Alignment of *hpn* (C) and *hpn2* (D) promoter regions in *H. pylori* 26695 (upper) and G27 (lower) strains, outline a significant deletion in the *hpn* promoter in strain G27.

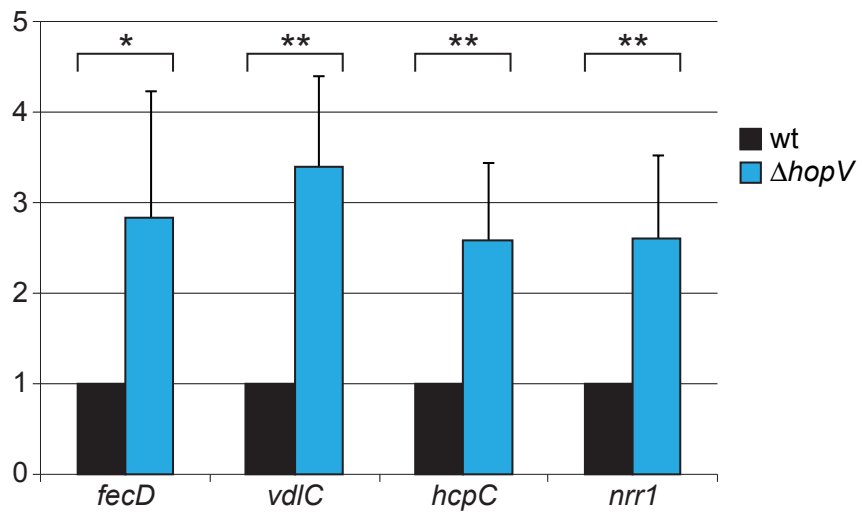

**Fig S5. Functional analysis of *hopV***

Effect of *hopV* deletion on the expression of NikR-regulated genes: FC values of the *fecD*, *vdlC*, *hcpC* and *nrr1* transcripts in the  $\Delta hopV$  mutant (cyan) vs. the wild type strain (black) are reported. qRT-PCR normalization and statistical analysis as in Fig. 1.

**Figure S6.** Original uncropped blots presented in Fig. 3

**A** Nrr1 RNA blot

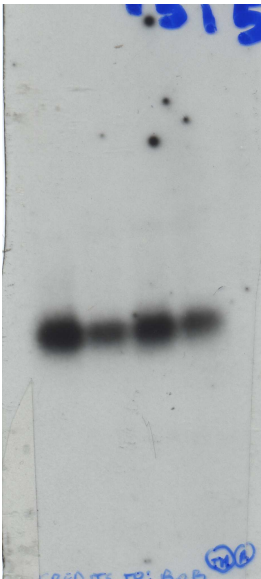

Ni- Ni+ Ni- Ni+  
G27 wt G27 wt  
replicate1 replicate2

**B** Nrr2 primer extension

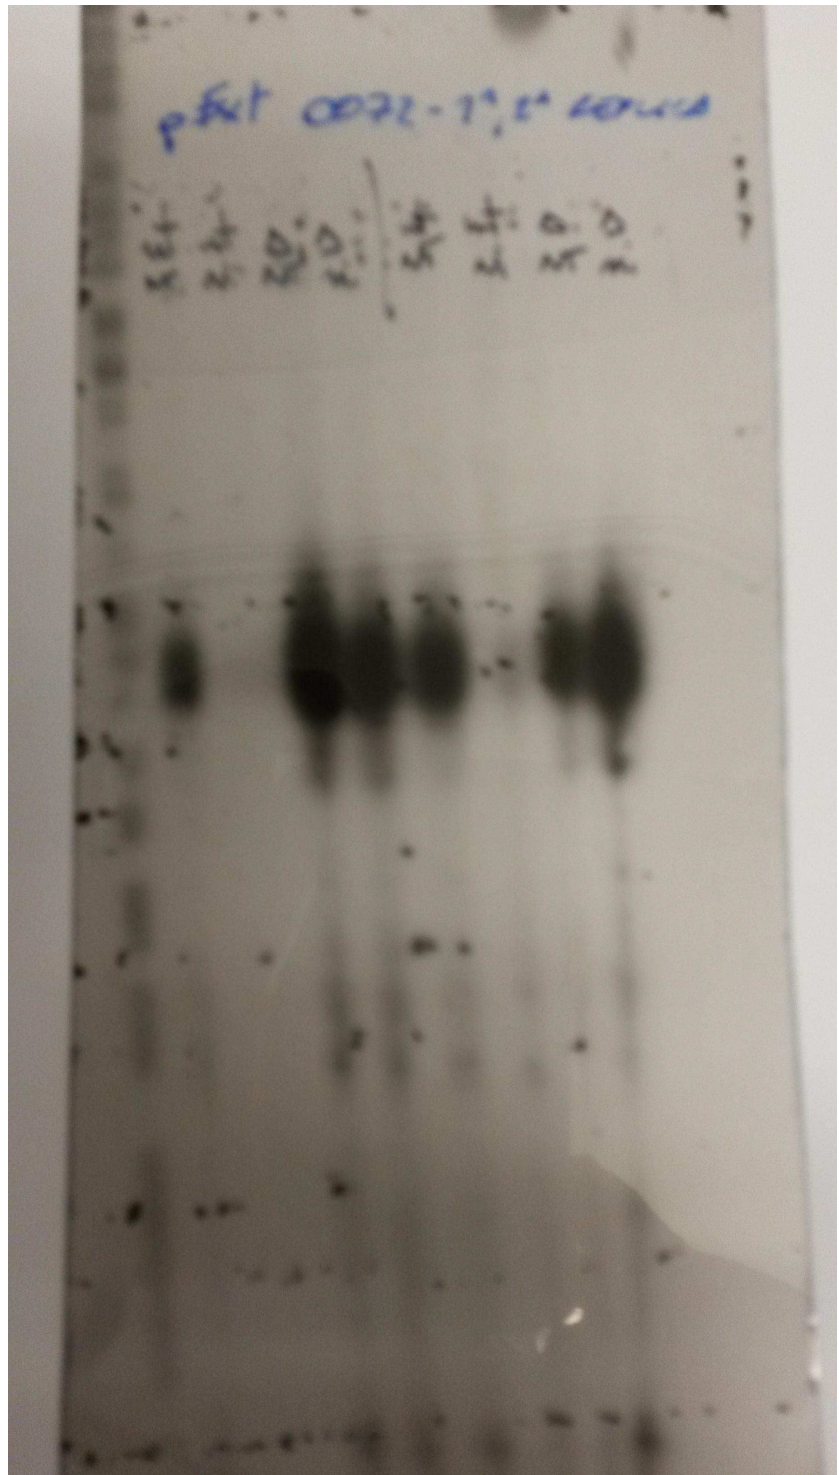

**C** IsoB RNA blot

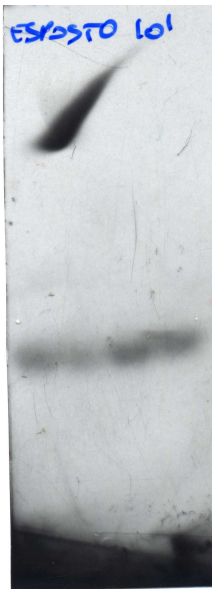

Ni- Ni+ Ni- Ni+  
G27 wt delta *nikR*
